# Supplementary material for: Variant interpretation in molecular autopsy: a useful dilemma
Source: Int J Legal Med. 2022 Jan 29;136(2):475–82. doi: 10.1007/s00414-021-02764-z (PMC8847204; doi:10.1007/s00414-021-02764-z)
Supplement: Supplementary file 1 — Supplementary file1 (XLSX 12.4 kb) [file 414_2021_2764_MOESM1_ESM.xlsx]

## Sheet: Supplement 1
Supplemental data
List of genes analysed
Major cardiac channelopathy and cardiomyopathy genes are listed in bold
	Gene	NM
	ABCC9	NM_005691
	ACTC1	NM_005159
	ACTN2	NM_001103
	AKAP9	NM_005751
	ANK2	NM_001148
	ANKRD1	NM_014391
	BAG3	NM_004281
	CACNA1C	NM_000719
	CACNA2D1	NM_000722
	CACNB2	NM_201596
	CALM1	NM_006888
	CALR3	NM_145046
	CASQ2	NM_001232
	CAV3	NM_033337
	CRYAB	NM_001885
	CSRP3	NM_003476
	CTF1	NM_001330
	DES	NM_001927
	DMD	NM_004006
	DPP6	NM_130797
	DCS2	NM_004949
	DSG2	NM_001943
	DSP	NM_004415
	DTNA	NM_001390
	EMD	NM_000117
	EYA4	NM_004100
	FHL2	NM_001450
	FKTN	NM_006731
	FXN	NM_000144
	GATAD1	NM_021167
	GLA	NM_000169
	GPD1L	NM_015141
	HCN4	NM_005477
	ILK	NM_004517
	JAG1	NM_000214
	JPH2	NM_020433
	JUP	NM_0002230
	KCND3	NM_004980
	KCNE1	NM_001127670
	KCNE2	NM_172201
	KCNE3	NM_005472
	KCNH2	NM_000238
	KCNJ2	NM_000891
	KCNJ5	NM_000890
	KCNJ8	NM_004982
	KCNQ1	NM_000218
	LAMA4	NM_001105206
	LAMP2	NM_013995
	LDB3	NM_007078
	LMNA	NM_170707
	MIB1	NM_020774
	MYBPC3	NM_000256
	MYH6	NM_002471
	MYH7	NM_000257
	MYL2	NM_000432
	MYL3	NM_000258
	MYLK2	NM_033118
	MYOZ2	NM_016599
	MYPN	NM_032578
	NEXN	NM_144573
	NKX2-5	NM_004387
	PDLIM3	NM_001114107
	PKP2	NM_004572
	PLN	NM_002667
	PRDM16	NM_022114
	PRKAG2	NM_0169203
	PTPN11	NM_002834
	RAF1	NM_002880
	RANGRF	NM_016492
	RBM20	NM_001134363
	RYR2	NM_001035
	SCN1B	NM_001037
	SCN3B	NM_018400
	SCN4B	NM_174934
	SCN5A	NM_198056
	SGCD	NM_004168
	SNTA1	NM_001128209
	TAZ	NM_003098
	TBX5	NM_000116
	TCAP	NM_003673
	TGFB3	NM_003239
	TMEM43	NM_024334
	TMPO	NM_003276
	TNNC1	NM_003280
	TNNI3	NM_000363
	TNNT2	NM_001001430
	TPM1	NM_000366
	TRDN	NM_001256021
	TRPM4	NM_017636
	TTN	NM_003319
	TTR	NM_000371
	TXNRD2	NM_006440
	VCL	NM_014000
